# Supplementary material for: Analytical Determination of Allergenic Fragrances in Indoor Air
Source: MDPI journal article supplement (doi:10.3390/separations9040099), 2022-04-13
Supplement: s1 [file s1]

# Analytical Determination of Allergenic Fragrances in Indoor Air

Catia Balducci <sup>1</sup>, Marina Cerasa <sup>1</sup>, Pasquale Avino <sup>2,\*</sup>, Paolo Ceci <sup>3</sup>, Alessandro Bacaloni <sup>4</sup>, Martina Garofalo <sup>1,4</sup>

<sup>1</sup> Institute of Atmospheric Pollution Research (CNR-IIA), National Research Council of Italy, Via Salaria Km 29.3, Monterotondo Scalo, P.O. Box 10, Rome, I-00015, Italy; balducci@iia.cnr.it (C.B.); marina.cerasa@iia.cnr.it (M.C.)

<sup>2</sup> Department of Agricultural, Environmental and Food Sciences (DiAAA), University of Molise, via De Sanctis, I-86100 Campobasso, Italy.

<sup>3</sup> Institute of Atmospheric Pollution Research, Division of Rome, c/o Ministry of Environment, Land and the Sea, via Cristoforo Colombo 44, Rome, I-00147, Italy; paolo.ceci@iia.cnr.it (P.C.)

<sup>4</sup> University of Rome, Department of Chemistry, Piazzale Aldo Moro 5, Rome, 00185, Italy; alessandro.bacaloni@uniroma1.it (A.B.); garofalo.1651813@studenti.uniroma1.it (M.G.)

\* Correspondence: avino@unimol.it; Tel.: +39-0874-404634

**Table S1.** Compounds detected through SIM-A.

| Compound                                      | MW     | CAS         | Retention<br>time | Quantitative<br>m/z | Confirmation<br>m/z |
|-----------------------------------------------|--------|-------------|-------------------|---------------------|---------------------|
| $\alpha$ -Pinene                              | 136.23 | 7785-70-8   | 4.25              | 91, 93              | 136                 |
| $\beta$ -Pinene                               | 136.23 | 18172-67-1  | 4.95              | 91, 94              | 136                 |
| $\alpha$ -Terpinene                           | 136.23 | 99-86-5     | 5.67              | 79, 121             | 136                 |
| Limonene                                      | 136.23 | 5989-27-5   | 5.93              | 93, 68              | 136                 |
| Benzyl alcohol                                | 108.14 | 100-51-6    | 6.02              | 79, 107             | 108                 |
| Linalool                                      | 154.25 | 78-70-6     | 7.55              | 93, 71              | 121                 |
| Menthol                                       | 156.27 | 89-78-1     | 9.63              | 95, 81              | 138                 |
| Terpineol $\alpha$                            | 154.25 | 98-55-5     | 10.17             | 59, 93              | 121                 |
| Citronellol                                   | 156.27 | 106-22-9    | 11.19             | 81, 95              | 123                 |
| Geraniol                                      | 154.25 | 106-24-1    | 12.01             | 69, 93              | 123                 |
| Anise alcohol                                 | 138.16 | 105-13-5    | 12.89             | 109, 137            | 138                 |
| trans-Anethole                                | 148.2  | 4180-23-8   | 13.02             | 117, 147            | 148                 |
| Cinnamyl alcohol                              | 134.18 | 104-54-1    | 13.6              | 92, 115             | 134                 |
| Eugenol                                       | 164.2  | 97-53-0     | 15.23             | 103, 149            | 164                 |
| $\beta,\beta,3$ -<br>Trimethylbenzenepropanol | 178.27 | 103694-68-4 | 16.92             | 91, 105             | 106                 |
| $\beta$ -Caryophyllene                        | 204.35 | 87-44-5     | 17.25             | 91, 93              | 133                 |
| Ebanol 1                                      | 208.34 | 67801-20-1  | 17.88             | 169, 194            | 108                 |
| Isoeugenol (E)                                | 164.2  | 5932-68-1   | 18.06             | 131, 149            | 164                 |
| Ebanol 2                                      | 208.34 | 67801-20-1  | 18.15             | 169, 194            | 108                 |
| $\alpha$ -Santalol                            | 220.35 | 115-71-9    | 24.15             | 93, 94              | 122                 |
| $\alpha$ -Amylcinnamyl alcohol                | 204.31 | 101-85-9    | 24.33             | 104, 215            | 133                 |
| $\beta$ -Santalol                             | 220.35 | 77-42-9     | 25.12             | 93, 94              | 122                 |
| trans,trans-Farnesol                          | 222.37 | 106-28-5    | 25.15             | 81, 93              | 107                 |
| Musk xylene                                   | 297.26 | 81-15-2     | 28.33             | 127, 297            | 282                 |
| Musk ketone                                   | 294.3  | 81-14-1     | 30.77             | 280, 294            | 279                 |
| Sclareol                                      | 308.5  | 515-03-7    | 35.16             | 95, 109             | 177                 |

**Table S2.** Compounds detected through SIM-B.

| Compound                                              | MW      | CAS        | Retention time | Quantitative m/z | Confirmation m/z |
|-------------------------------------------------------|---------|------------|----------------|------------------|------------------|
| Benzaldehyde                                          | 106.121 | 100-52-7   | 4.66           | 105              | 106, 51          |
| Salicylaldehyde                                       | 122.12  | 90-02-8    | 6.28           | 122              | 65, 121          |
| Terpinolene                                           | 136.23  | 586-62-9   | 7.33           | 121              | 93, 136          |
| Camphor                                               | 152.23  | 464-49-1   | 8.88           | 81               | 95, 108          |
| Methyl salicylate                                     | 152.15  | 119-16-8   | 10.29          | 120              | 92, 152          |
| Folione                                               | 154.21  | 111-12-6   | 10.42          | 123              | 95, 111          |
| Neral                                                 | 152.23  | 5392-40-5  | 11.63          | 119              | 69, 84           |
| Carvone                                               | 150.22  | 2244-16-8  | 11.74          | 108              | 54, 82           |
| Linalyl acetate                                       | 196.29  | 115-95-7   | 12.04          | 121              | 80, 93           |
| Geranial                                              | 152.23  | 141-27-5   | 12.51          | 152              | 84, 83           |
| Cinnamaldehyde                                        | 132.16  | 14371-10-9 | 12.53          | 131              | 103, 132         |
| $\alpha$ -Hexylcinnamaldehyde                         | 216.32  | 101-86-0   | 12.98          | 71               | 59, 95           |
| DMBCA acetate                                         | 192.25  | 151-05-1   | 14.06          | 132              | 91, 117          |
| $\alpha$ -Damascone                                   | 192.3   | 43052-87-5 | 15.79          | 123              | 69, 192          |
| Geranyl acetate                                       | 196.29  | 105-87-1   | 16.00          | 136              | 68, 93           |
| $\beta$ -Damascenone (Rose Ketone-4)                  | 190.28  | 23696-85-7 | 16.10          | 175              | 69, 190          |
| $\delta$ -Damascone(Rose Ketone-1)                    | 192.3   | 57378-68-4 | 16.38          | 123              | 69, 192          |
| Vanillin                                              | 152.15  | 121-335    | 16.47          | 151              | 152, 81          |
| (E)- $\beta$ -Damascone                               | 192.3   | 23726-91-2 | 17.02          | 177              | 123, 192         |
| Coumarin                                              | 229.16  | 91-64-5    | 17.66          | 146              | 89, 118          |
| $\alpha$ -Isomethylionone                             | 206.32  | 127-51-5   | 18.98          | 150              | 135, 206         |
| Eugenyl acetate                                       | 206.24  | 93-28-7    | 20.26          | 164              | 131, 149         |
| Butylphenyl methylpropional (Lilyal)                  | 204.31  | 80-54-6    | 20.28          | 189              | 147, 204         |
| 3-Propylidenephthalide                                | 174.2   | 17369-59-4 | 21.50          | 159              | 104, 174         |
| Amyl salicylate                                       | 208.25  | 2050-08-0  | 21.54          | 120              | 138, 208         |
| Isoeugenyl acetate                                    | 206.24  | 93-29-8    | 22.59          | 164              | 131, 149         |
| $\alpha$ -Amylcinnamaldehyde,                         | 202.29  | 78605-96-6 | 23.41          | 129              | 201, 202         |
| Hydroxyisohexyl 3-cyclohexene carboxaldehyde (HICC-3) | 210.32  | 31906-04-4 | 23.60          | 136              | 177, 192         |
| ISO E@ $\beta$                                        | 234.38  | 54464-57-2 | 23.87          | 191              | 109, 121         |
| ISO E@ $\gamma$                                       | 234.38  | 68155-67-9 | 23.65          | 191              | 109, 121         |
| Hydroxyisohexyl 4-cyclohexene carboxaldehyde (HICC-4) | 210.32  | 51414-25-6 | 23.76          | 136              | 177, 192         |
| ISO E@ $\alpha$                                       | 234.38  | 68155-66-8 | 24.01          | 191              | 109, 121         |
| $\alpha$ -Hexylcinnamaldehyde (Jasmonal)              | 216.32  | 101-86-0   | 25.75          | 129              | 215, 216         |
| Benzyl benzoate                                       | 212.24  | 120-51-4   | 26.15          | 105              | 194, 212         |
| $\alpha$ -Acetyl cedrene                              | 246.39  | 32388-55-9 | 26.36          | 161              | 119, 231         |
| Galaxolide 1                                          | 258.4   | 1222-05-5  | 28.09          | 243              | 213, 258         |
| Galaxolide 2                                          | 258.4   | 1222-05-5  | 28.12          | 243              | 213, 258         |
| Benzyl salicylate                                     | 228.24  | 118-58-1   | 28.41          | 91               | 65, 228          |
| Hexadecanolactone                                     | 254.41  | 109-29-5   | 29.75          | 83               | 97, 111          |
| Dihydroambrettolide                                   |         |            |                |                  |                  |
| Benzyl cinnamate                                      | 238.28  | 103-41-3   | 32.76          | 131              | 192, 193         |

**Table S3.** Percent recovery of the standards during in the tests for the extraction procedure setting. TMP, *trimethylpentane*. DCM, *dichloromethane*.

| Compound                     | TEST A (%R $\pm$ SD) |                |                | TEST B (%R $\pm$ SD) |                  |                  |
|------------------------------|----------------------|----------------|----------------|----------------------|------------------|------------------|
|                              | 5.5 ml<br>TMP        | 10 ml<br>DCM   | 10 ml<br>DCM   | 5.5 ml<br>n-hexane   | 10 ml<br>Acetone | 10 ml<br>Acetone |
| Salicylaldehyde              | 9.7 $\pm$ 4.0        | 11.2 $\pm$ 3.6 | 12.2 $\pm$ 0.2 | 10.0 $\pm$ 3.7       | 31.4 $\pm$ 3.0   | 20.8 $\pm$ 2.2   |
| Camphor                      | 8.8 $\pm$ 3.1        | 21.4 $\pm$ 3.1 | 11.3 $\pm$ 1.2 | 9.2 $\pm$ 2.8        | 28.8 $\pm$ 5.1   | 21.1 $\pm$ 3.8   |
| Folione                      | 9.8 $\pm$ 4.1        | 22.4 $\pm$ 2.9 | 10.5 $\pm$ 0.7 | 10.1 $\pm$ 3.2       | 23.4 $\pm$ 4.2   | 20.5 $\pm$ 3.2   |
| Neral                        | 11.2 $\pm$ 5.2       | 24.0 $\pm$ 3.6 | 10.8 $\pm$ 1.1 | 10.7 $\pm$ 4.7       | 28.4 $\pm$ 3.4   | 23.5 $\pm$ 1.7   |
| Carvone                      | 9.8 $\pm$ 3.4        | 25.7 $\pm$ 3.3 | 12.3 $\pm$ 0.8 | 10.3 $\pm$ 3.2       | 27.4 $\pm$ 2.8   | 22.7 $\pm$ 2.5   |
| Geranial                     | 9.5 $\pm$ 3.2        | 20.2 $\pm$ 3.1 | 9.4 $\pm$ 0.4  | 9.2 $\pm$ 3.2        | 25.7 $\pm$ 2.7   | 19.7 $\pm$ 3.4   |
| DMBCA                        | 9.9 $\pm$ 2.8        | 22.1 $\pm$ 3.7 | 11.2 $\pm$ 0.6 | 9.7 $\pm$ 3.0        | 25.1 $\pm$ 3.3   | 15.6 $\pm$ 1.9   |
| Geranyl acetate              | 11.8 $\pm$ 2.5       | 27.3 $\pm$ 4.0 | 10.8 $\pm$ 0.8 | 12.9 $\pm$ 1.2       | 22.9 $\pm$ 3.4   | 19.7 $\pm$ 2.1   |
| $\beta$ -Damascenone         | 9.5 $\pm$ 3.3        | 23.3 $\pm$ 3.6 | 9.5 $\pm$ 1.3  | 9.1 $\pm$ 3.2        | 24.6 $\pm$ 2.6   | 21.2 $\pm$ 3.7   |
| $\delta$ -Damascone          | 9.3 $\pm$ 2.3        | 23.6 $\pm$ 4.1 | 10.0 $\pm$ 2.0 | 10.1 $\pm$ 2.2       | 33.8 $\pm$ 1.8   | 24.3 $\pm$ 2.3   |
| $\beta$ -Damascone           | 9.1 $\pm$ 1.7        | 20.7 $\pm$ 4.2 | 9.2 $\pm$ 0.3  | 8.7 $\pm$ 2.0        | 29.2 $\pm$ 2.3   | 25.1 $\pm$ 1.8   |
| Coumarin                     | 9.1 $\pm$ 2.1        | 25.5 $\pm$ 4.9 | 10.7 $\pm$ 2.5 | 10.5 $\pm$ 1.7       | 28.3 $\pm$ 2.3   | 21.1 $\pm$ 2.5   |
| $\alpha$ -Isomethylionone    | 12.2 $\pm$ 3.4       | 21.9 $\pm$ 4.2 | 13.4 $\pm$ 1.8 | 11.3 $\pm$ 2.8       | 35.1 $\pm$ 2.0   | 25.6 $\pm$ 2.0   |
| Eugenyl acetate              | 10.3 $\pm$ 2.9       | 17.5 $\pm$ 3.4 | 10.3 $\pm$ 2.8 | 11.3 $\pm$ 1.9       | 21.9 $\pm$ 2.6   | 23.6 $\pm$ 3.1   |
| 3-Propylidenephthalide       | 10.8 $\pm$ 4.3       | 22.0 $\pm$ 6.1 | 17.1 $\pm$ 2.3 | 11.6 $\pm$ 3.4       | 25.3 $\pm$ 5.4   | 20.6 $\pm$ 2.6   |
| $\alpha$ -Amylcinnamaldehyde | 9.3 $\pm$ 2.1        | 13.7 $\pm$ 1.7 | 7.6 $\pm$ 1.2  | 9.2 $\pm$ 2.1        | 28.4 $\pm$ 2.9   | 22.2 $\pm$ 1.8   |
| ISO E <sup>®</sup> Y         | 10.0 $\pm$ 2.0       | 10.1 $\pm$ 2.1 | 4.9 $\pm$ 0.4  | 9.2 $\pm$ 1.8        | 22.8 $\pm$ 2.3   | 19.8 $\pm$ 2.2   |
| Musk xylene                  | 7.5 $\pm$ 2.1        | 11.4 $\pm$ 2.3 | 4.9 $\pm$ 0.4  | 8.8 $\pm$ 1.6        | 38.3 $\pm$ 3.1   | 22.8 $\pm$ 1.4   |
| Musk ketone                  | 9.4 $\pm$ 2.6        | 10 $\pm$ 1.1   | 7.7 $\pm$ 0.5  | 9.6 $\pm$ 2.5        | 31.5 $\pm$ 1.2   | 25.3 $\pm$ 2.1   |
| Benzyl cinnamate             | 8.8 $\pm$ 3.5        | 22.5 $\pm$ 3.2 | 10.5 $\pm$ 1.0 | 10.1 $\pm$ 3.0       | 31.7 $\pm$ 3.2   | 25.6 $\pm$ 2.9   |

**Table S4.** Percentage Recovery (%R) and Standard Deviation (SD) of the method at three levels of native compounds

| Compound/Classes <sup>1</sup>          | Level 1 (100 ng) |    | Level 2 (3000 ng) |    | Level 3 (7500 ng) |    |
|----------------------------------------|------------------|----|-------------------|----|-------------------|----|
|                                        | %R               | SD | %R                | SD | %R                | SD |
| <b>Terpenes, Terpenoids, Aldehydes</b> |                  |    |                   |    |                   |    |
| Terpinolene                            | 81.8             | 3  | 63.1              | 5  | 78.5              | 8  |
| Neral                                  | 71.4             | 7  | 86.9              | 4  | 92.2              | 1  |
| Geranial                               | 66.7             | 6  | 85.1              | 7  | 91.9              | 4  |
| Carvone                                | 64.6             | 9  | 75.7              | 3  | 93.7              | 3  |
| Cinnamaldehyde                         | 51.8             | 2  | 75.8              | 9  | 85.9              | 1  |
| Hydroxycitronellal                     | 60.9             | 1  | 83.9              | 13 | 95.2              | 5  |
| Vanillin                               | 70.1             | 1  | 110               | 4  | 114               | 10 |
| Lylial                                 | 60.7             | 1  | 64.1              | 4  | 88.2              | 5  |
| a-Amylcinnamaldehyde                   | 70.9             | 1  | 85.1              | 3  | 91.4              | 4  |
| a-Hexylcinnamaldehyde                  | 63.5             | 2  | 50.9              | 8  | 127               | 14 |
| <b>Salicylates</b>                     |                  |    |                   |    |                   |    |
| Salicylaldehyde                        | 77.1             | 8  | 92.7              | 7  | 83.4              | 14 |
| Methyl salicylate                      | 63.8             | 4  | 86.3              | 3  | 95.3              | 4  |
| Amyl salicylate                        | 50.1             | 3  | 66.6              | 4  | 84.9              | 2  |
| Benzyl salicylate                      | 58.7             | 2  | 72.1              | 9  | 140               | 1  |
| <b>Ketones</b>                         |                  |    |                   |    |                   |    |
| Camphor                                | 82.7             | 7  | 77.9              | 1  | 86.9              | 8  |
| Folione                                | 72.8             | 4  | 88.7              | 3  | 97.7              | 0  |
| a-Damascone                            | 63.4             | 1  | 55.4              | 4  | 90.2              | 4  |
| β-Damasconone                          | 69.3             | 1  | 66.2              | 5  | 86.2              | 6  |
| δ-Damascone                            | 70.4             | 0  | 68.7              | 4  | 86.3              | 6  |
| β-Damascone                            | 72.4             | 1  | 73                | 5  | 91.3              | 6  |
| Coumarin                               | 67.1             | 5  | 70.7              | 5  | 86.4              | 4  |
| a-Isomethylionone                      | 79.6             | 1  | 70.5              | 4  | 89.8              | 6  |
| 3-Propylidenephthalide                 | 69.1             | 0  | 77.9              | 2  | 83.3              | 3  |
| ISO E®Y                                | 78.3             | 3  | 83.1              | 1  | 92.2              | 3  |
| ISO E®β                                | 58.7             | 2  | 62.7              | 1  | 90.7              | 7  |
| ISO E®α                                | 70.4             | 3  | 63.5              | 2  | 109               | 2  |
| a-Acetyl cedrene                       | 71.4             | 5  | 57.4              | 8  | 136               | 20 |
| Hexadecanolactone                      | 96.2             | 10 | 62.3              | 7  | 142               | 29 |
| <b>Acetate</b>                         |                  |    |                   |    |                   |    |
| Linalyl acetate                        | 72               | 7  | 88.9              | 4  | 112               |    |
| DMBCA                                  | 74.8             | 2  | 82                | 6  | 92.5              | 5  |
| Geranyl acetate                        | 66.9             | 1  | 70.4              | 5  | 84.3              | 3  |
| Eugenyl acetate                        | 75.4             | 1  | 81.2              | 4  | 88.9              | 5  |
| Isoeugenyl acetate                     | 61.7             | 1  | 76.3              | 2  | 87.6              | 3  |
| <b>Musks</b>                           |                  |    |                   |    |                   |    |
| Musk xylene                            | 90               | 5  | 90.5              | 11 | 92.4              | 6  |

|                           |       |      |       |      |       |      |
|---------------------------|-------|------|-------|------|-------|------|
| Musk ketone               | 65.4  | 1    | 76.9  | 5    | 73.6  | 3    |
| Galaxolide 1              | 73.3  | 2    | 57.9  | 7    | 131   | 27   |
| Galaxolide 2              | 69.2  | 6    | 52    | 4    | 134   | 20   |
| <b>Esters</b>             |       |      |       |      |       |      |
| Benzyl benzoate           | 74.1  | 10   | 48.2  | 7    | 125   | 14   |
| Benzyl cinnamate          | 79.3  | 5    | 88.1  | 5    | 115   | 8    |
| <b>Light Terpenes</b>     |       |      |       |      |       |      |
| $\alpha$ -Pinene          | 18    | 3    | 39.1  | 3    | 43.9  | 2    |
| $\beta$ -Pinene           | 27.6  | 11   | 46.1  | 1    | 39.5  | 2    |
| $\alpha$ -Terpinene       | 40.3  | 4    | 41.1  | 5    | 55    | 12   |
| Limonene                  | 25.3  | 6    | 83.5  | 6    | 49.7  | 8    |
| <b>Alcoli</b>             |       |      |       |      |       |      |
| Linalool                  | 56.1  | 3    | 63.2  | 6    | 69.2  | 8    |
| Menthol                   | 56.4  | 10   | 68.2  | 7    | 105   | 2    |
| Terpineol $\alpha$        | 54.6  | 3    | 65.7  | 8    | 72.7  | 1    |
| Citronellol               | 50.1  | 9    | 85.6  | 17   | 120   | 3    |
| Geraniol                  | 71    | 12   | 143   | 22   | 131   | 1    |
| Cinnamyl alcohol          | 79.4  | 11   | 127   | 27   | 93.8  | 7    |
| trans-Anethole            | 52.1  | 1    | 64.1  | 8    | 71.6  | 6    |
| Eugenol                   | 34    | 6    | 68.4  | 13   | 64.4  | 3    |
| $\beta$ -Caryophyllene    | 61.3  | 1    | 51.7  | 3    | 78.5  | 8    |
| Isoeugenol (E)            | 46.1  | 15   | 70.7  | 7    | 60.5  | 6    |
| $\beta$ - Santalol        | 99.8  | 17   | 220   | 24   | 90.2  | 7    |
| $\beta,\beta,3$ -Tmbp     | 82    | 21   | 79.4  | 8    | 152   | 13   |
| Sclareol                  | 76.5  | 4    | 114   | 10   | 115   | 1    |
| <b>Unreable compounds</b> |       |      |       |      |       |      |
| Benzaldehyde              | -4145 | 1306 | -3389 | 171  | 120   | 23   |
| HICC-4                    | 77.2  | 1    | 127   | 2    | 88.7  | 2    |
| HICC-3                    | 43.7  | 2    | 79.5  | 3    | 77.8  | 2    |
| Benzyl alcohol            | -118  | 185  | 164   | 12   | 66.4  | 8    |
| Anise alcohol             | 89.5  | 11   | 261   | 55   | 192   | 5    |
| Ebanol 1                  | 1092  | 909  | 16866 | 1159 | 21238 | 1191 |
| Ebanol 2                  | 89.5  | 5    | 103   | 5    | 134   | 2    |
| trans,trans-Farnesol      | 3465  | 927  | 6255  | 354  | 10414 | 217  |
| a-Santalol                | 154   | 15   | 54.4  | 4    | 199   | 8    |
| a-Amylcinnamyl alcohol    | 196   | 10   | 298   | 7    | 302   | 2    |

<sup>1</sup>The compounds were divided on the basis of common characteristics, by functional group or similar behavior shown during extraction. White was subtracted for each data reported.

**Table S5.** % of ng lost during the sampling for Breakthrough evaluation

| Classes/Compounds            | First<br>sampling<br>%ng loss | Second<br>Sampling<br>%ng loss |
|------------------------------|-------------------------------|--------------------------------|
| <b>Terpenes, Terpenoids,</b> |                               |                                |
| <b>Aldheydes</b>             |                               |                                |
| Terpinolene                  | ND                            | 1.55                           |
| Neral                        | ND                            | 0.18                           |
| Geranial                     | ND                            | 0.21                           |
| Carvone                      | 0.32                          | 0.17                           |
| Cinnamaldehyde               | 0.07                          | 0.07                           |
| Hydroxycitronellal           | ND                            | ND                             |
| Vanillin                     | 2.63                          | 2.68                           |
| Lylial                       | 0.11                          | 0.12                           |
| a-Amylcinnamaldehyde         | 0.24                          | 0.24                           |
| a-Hexylcinnamaldehyde        | 0.11                          | 0.16                           |
| <b>Salicylates</b>           |                               |                                |
| Salicylaldehyde              | 12.8                          | 14.2                           |
| Methyl salicylate            | 0.27                          | 0.21                           |
| Amyl salicylate              | 0.21                          | 0.23                           |
| Benzyl salicylate            | 0.58                          | 0.58                           |
| <b>Ketones</b>               |                               |                                |
| Camphor                      | 4.9                           | 6.9                            |
| Folione                      | ND                            | 0.26                           |
| a-Damascone                  | ND                            | ND                             |
| β-Damascenone                | 0.15                          | 0.16                           |
| δ-Damascone                  | ND                            | 0.99                           |
| (E)-β-Damascone              | 0.16                          | 0.17                           |
| Coumarin                     | 0.10                          | 0.12                           |
| a-Isomethylionone            | 0.15                          | 0.16                           |
| 3-Propylidenephthalide       | 0.14                          | 0.14                           |
| ISO E®Y                      | ND                            | 0.52                           |
| ISO E®β                      | ND                            | 0.3                            |
| ISO E®α                      | ND                            | 10.4                           |
| a-Acetyl cedrene             | 0.07                          | 0.07                           |
| Hexadecanolactone            | ND                            | ND                             |
| <b>Acetate</b>               |                               |                                |
| Linalyl acetate              | ND                            | ND                             |
| DMBCA                        | 0.12                          | 0.13                           |
| Geranyl acetate              | ND                            | 0.18                           |
| Eugenyl acetate              | 0.16                          | 0.16                           |
| Isoeugenyl acetate           | <LOQ                          | LOQ                            |
| <b>Musks</b>                 |                               |                                |

|                                |      |      |
|--------------------------------|------|------|
| Musk xylene                    | ND   | ND   |
| Musk ketone                    | ND   | 1.67 |
| Galaxolide 1                   | 0.07 | 0.07 |
| Galaxolide 2                   | 0.07 | 0.09 |
| <b>Esters</b>                  |      |      |
| Benzyl benzoate                | 0.13 | 0.14 |
| Benzyl cinnamate               | 0.29 | ND   |
| <b>Light Terpenes</b>          |      |      |
| $\alpha$ -Pinene               | 5.41 | 4.9  |
| $\beta$ -Pinene                | 4.46 | 4.54 |
| $\alpha$ -Terpinene            | 0.81 | 1.1  |
| Limonene                       | 2.76 | 1.27 |
| <b>Alcoli</b>                  |      |      |
| Linalool                       | 0.24 | 0.19 |
| Menthol                        | 0.45 | 0.33 |
| Terpineol $\alpha$             | 0.44 | 0.28 |
| Citronellol                    | <LOQ | <LOQ |
| Geraniol                       | 0.31 | 0.29 |
| Cinnamyl alcohol               | ND   | ND   |
| trans-Anethole                 | ND   | 0.12 |
| Eugenol                        | <LOQ | 0.13 |
| $\beta$ -Caryophyllene         | 0.19 | 0.18 |
| Isoeugenol (E)                 | 0.3  | 0.51 |
| $\beta$ - Santalol             | ND   | 0.54 |
| $\beta,\beta,3$ -Tmbp          | <LOQ | <LOQ |
| Sclareol                       | ND   | ND   |
| <b>Unreable compounds</b>      |      |      |
| Benzaldehyde                   | 137  | 88.8 |
| HICC-4                         | 2    | ND   |
| HICC-3                         | 1    | <LOQ |
| Benzyl alcohol                 | 12.1 | 3.58 |
| Anise alcohol                  | 0.07 | 0.09 |
| Ebanol 1                       | 20.4 | 10.4 |
| Ebanol 2                       | 2.18 | 4.18 |
| trans,trans-Farnesol           | ND   | 6.22 |
| $\alpha$ -Santalol             | ND   | 1.05 |
| $\alpha$ -Amylcinnamyl alcohol | ND   | 2.54 |
| Benzyl alcohol                 | 12.1 | 3.58 |

<sup>1</sup>The compounds were divided on the basis of common characteristics, by functional group or similar behavior shown during extraction. White was subtracted for each data reported. ND: not detected



**Table S6.** Results of the semi-quantitative determination of fragrances in the house and in the coffee bar.

| Compound ng/m3        | House | Coffee shop |
|-----------------------|-------|-------------|
| Terpinolene           | 64.4  | 138         |
| Vanillin              | 25.1  | 182         |
| Lylial                | 10.9  | 49.4        |
| a-Hexylcinnamaldehyde | 168   | 92.1        |
| Methyl salicylate     | 23.3  | 40.5        |
| Amyl salicylate       | 72.8  | 162         |
| Benzyl salicylate     | 235   | 182         |
| ISO E®β               | < LOQ | < LOQ       |
| ISO E®α               | < LOQ | < LOQ       |
| Linalyl acetate       | 436   | 242         |
| Galaxolide 1          | 97.6  | 46.3        |
| Galaxolide 2          | 92.7  | 40.8        |
| Benzyl benzoate       | 46.8  | 57.2        |
| Linalool              | 634   | 266         |
| Menthol               | 458   | 2450        |
| Terpineol α           | 73.1  | 70          |
| Citronellol           | 111   | 73.5        |
| Geraniol              | 52.4  | 19.4        |
| β-Caryophyllene       | 12.3  | 17.6        |
| Isoeugenol (E)        | 3.15  | 3.85        |
